# Supplementary material
Source: publisher site journal article supplement (https://www.dovepress.com/article/405397)
Supplement: Supplementary file 1 [file get_supplementary_file.php]

**Supplementary materials. Directed acyclic graphs model visualizations**

**Model 1**

*Exposure:*

Proportion of population certified in BLS Bystander CPR rate at OHCA

*Outcome:*

30-day survival from OHCA

*Adjusted for:*

Initial (shockable) rhythm  
 Mean Charlson Index  
 Mean income  
 Mean age



**Model 2.**

*Exposure:*

Bystander CPR rate at OHCA

*Outcome:*

30-day survival from OHCA

*Adjusted:*

OHCA EMS response time  
 Mean income  
 Mean age



AED: Automatic External Defibrillator

BLS: Basic Life Support

CPR: Cardiopulmonary resuscitation

OHCA: Out-of-hospital cardiac arrest

EMS: Emergency Medical Services
